# Supplementary material for: Comparison of response evaluation criteria in solid tumors and tumor regression grade in evaluating the effect of preoperative systemic therapy of gastric cancer
Source: PubMed Central journal article supplement (PMC9526302; doi:10.1186/s12885-022-10125-1), 2022-10-01
Supplement: 12885_2022_10125_MOESM5_ESM.pdf [file 12885_2022_10125_MOESM5_ESM.pdf]

A

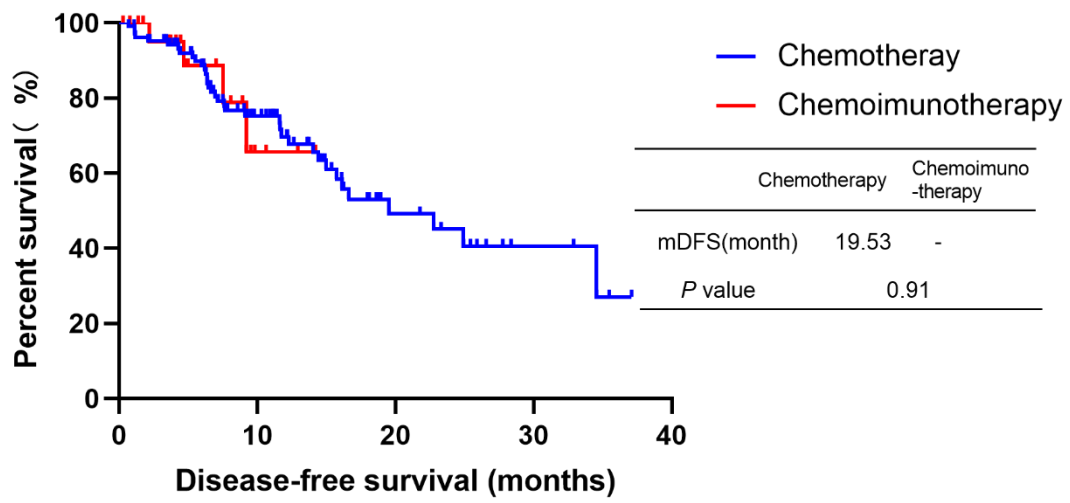

B

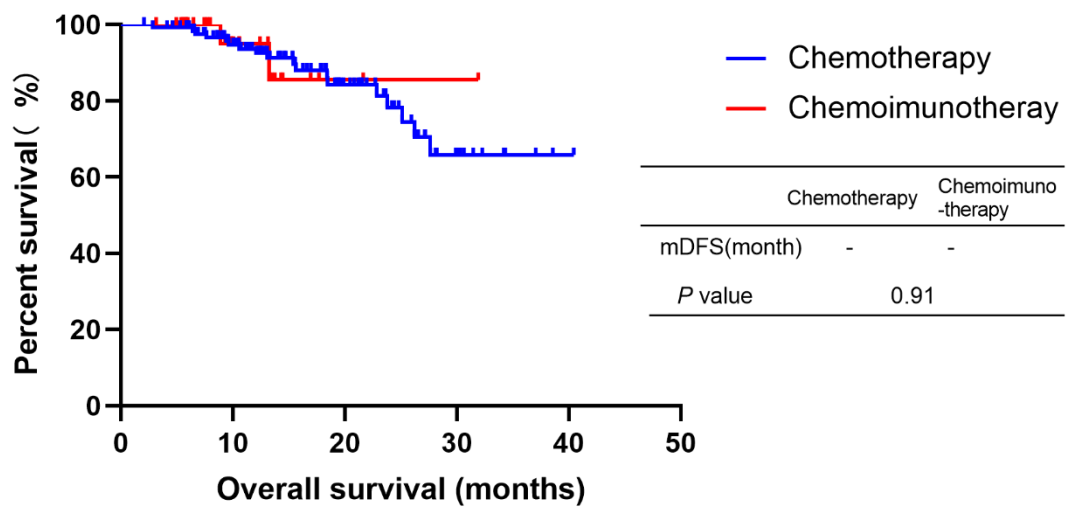

Supplement Figure 3. Kaplan-Meier curves for patients who received different preoperative treatments. (A) Disease-free survival,  $P=0.91$ ; (B) Overall survival,  $P=0.91$ .
